# **Wastewater surveillance for *Salmonella* Typhi and its association with seroincidence of enteric fever in Vellore, India**

**Short Title:** *Salmonella* Typhi in wastewater and enteric fever in Vellore, India

Dilip Abraham<sup>1</sup>, Lalithambigai Kathiresan<sup>1</sup>, Kristen Aiemjoy<sup>2</sup>, Richelle C. Charles<sup>3</sup>, Dilesh Kumar<sup>1</sup>, Rajan Srinivasan<sup>1</sup>, Catherine Troman<sup>4</sup>, Elizabeth Gray<sup>4</sup>, Christopher B. Uzzell, Jacob John<sup>1</sup>, Balaji Veeraraghavan<sup>1</sup>, Nicholas C. Grassly<sup>4</sup>, Venkata Raghava Mohan<sup>1\*</sup>

<sup>1</sup> Christian Medical College, Vellore, Tamil Nadu, India

<sup>2</sup> University of California, Davis School of Medicine, California

<sup>3</sup> Massachusetts General Hospital, Harvard Medical School, Harvard T.H. Chan School of Public Health, Boston, MA USA

<sup>4</sup> Department of Infectious Disease Epidemiology, Imperial College, London

\*Corresponding author

Email: venkat@cmcvellore.ac.in

## Abstract

### Background

Blood culture-based surveillance for typhoid fever has limited sensitivity, encountering operational challenges in resource-limited settings. Environmental surveillance targeting *Salmonella* Typhi (*S. Typhi*) shed in wastewater (WW), coupled with cross-sectional serosurveys of *S. Typhi*-specific antibodies estimating exposure to infection, emerges as a promising alternative.

### Methods

We assessed the feasibility and effectiveness of wastewater (WW) and sero-surveillance for *S. Typhi* in Vellore, India, from May 2022 to April 2023. Monthly samples were collected from 40 sites in open drainage channels and processed using standardized protocols. DNA was extracted and analyzed via quantitative PCR for *S. Typhi* genes (*ttr*, *tviB*, *staG*) and the fecal biomarker HF183. Clinical cases of enteric fever were recorded from four major hospitals, and a cross-sectional serosurvey measured hemolysin E (HlyE) IgG levels in children under 15 years to estimate seroincidence.

### Results

7.5% (39/520) of grab and 15.3% (79/517) Moore swabs were positive for all 3 *S. Typhi* genes. Moore swab positivity was significantly associated with HF183 (adjusted odds ratio (aOR): 3.08, 95% CI: 1.59 – 5.93) and upstream catchment population (aOR: 4.67, 1.97 – 11.04), and there was increased detection during monsoon season - membrane filtration (aOR: 2.56, 1.02 – 6.41), and Moore swab samples (aOR: 2.03, 1.01 – 3.97).

Only 11 blood culture-confirmed typhoid cases were documented over the study period. Estimated seroincidence was 10.4/100 person-years (py) (95% CI: 9.61 - 11.5/100 py). The number of *S. Typhi* positive samples at a site was associated with the estimated seroincidence in the site catchment population (incidence rate ratios: 1.14 (1.07-1.23) and 1.10 (1.02-1.20) for grab and Moore swabs respectively.

## **Conclusions**

These findings underscore the utility and effectiveness of alternate surveillance approaches to estimating the incidence of *S. Typhi* infection in resource-limited settings, offering valuable insights for public health interventions and disease monitoring strategies where conventional methods are challenging to implement.

**Keywords:** *Salmonella Typhi*; India; Typhoid fever; Vaccine; Wastewater surveillance: Seroincidence

## Author Summary

Our study explores the potential of detecting *Salmonella* Typhi in wastewater, informing public health strategies, guiding vaccination campaigns, and monitoring the effectiveness of interventions, contributing to better disease control and prevention policies.

*S. Typhi* positivity rates of 7.50% and 15.30% were observed in grab samples and Moore swabs, respectively, and significant correlations were found between *S. Typhi* positivity in Moore swabs and fecal contamination marker levels in wastewater samples.

The study also estimated that the community seroincidence for typhoid 10.40/100 person-years and *S. Typhi* detections in WW positively correlated with seroincidence.

The study reveals significant associations between wastewater *S. Typhi* positivity and typhoid seroincidence, seasonal variations, and population dynamics, providing deeper insights into the epidemiology of typhoid fever.

## Introduction

Globally, approximately 11 million new cases of typhoid infection occur annually, resulting in 77,000 to 219,000 deaths [1] mainly driven by the high incidences in Southeast Asia and sub-Saharan Africa, with India being one of the countries with the highest incidences [2]. Despite significant improvements in access to safe drinking water and sanitation in India over recent decades, typhoid remains a major challenge, especially in urban and peri-urban areas. Vellore, a city in Tamil Nadu, has a high incidence of typhoid fever. From 2017 to 2020, the annual incidence among children aged 0–14 was estimated at 1,173 cases per 100,000 [3,4], with a positivity rate of 3.5% for suspected enteric fevers in Tier 1 community-based surveillance, as described in the Surveillance for Enteric Fever in India (SEFI) study [4].

Typhoid incidence in urban and peri-urban Indian communities is often underestimated due to frequent early self-medication with readily available over-the-counter antibiotics, reducing blood culture sensitivity. This indiscriminate antibiotic use increases the risk of antimicrobial resistance, with the emergence of extensively drug-resistant *S. Typhi* strains [5,6].

In 2020, the World Health Organization (WHO) recommended Typhoid Conjugate Vaccines to control typhoid fever, prioritizing countries with high disease burden or record of antimicrobial-resistant *S. Typhi* [7]. However, data on typhoid fever in Low- and Middle-Income Countries (LMICs) are limited due to insufficient resources for blood culture surveillance, impeding vaccine introduction [8]. Microbiological culture, despite limitations in sensitivity is the reference standard for *S. Typhi* detection in clinical practice and surveillance and no other diagnostic test currently matches the accuracy of blood cultures for disease

surveillance. However, it is time-consuming and resource-intensive, complicating detection in typhoid-endemic LMICs [9,10].

Environmental surveillance (ES) of sewage and wastewater (WW) samples is a cost-effective alternative to blood culture-based fever surveillance for detecting microorganisms [11]. ES can estimate subclinical disease transmission within communities. Currently, ES is mainly used in polio surveillance to complement vaccination programs, aiding in identifying transmission and guiding targeted vaccination efforts [12]. The COVID-19 pandemic has further promoted ES as a valuable tool for monitoring infectious diseases, including respiratory infections [13,14]. ES-based surveillance has identified *S. Typhi* in WW in Nepal, Pakistan, India, Malawi, and Bangladesh [11,15,16].

Potential use cases for ES of *S. Typhi* include supporting routine vaccination, monitoring intervention strategies (e.g., vaccines or improved water, sanitation, and hygiene), detecting emergence and transmission of *S. Typhi* in non-endemic regions, and identifying antimicrobial-resistant lineages [17]. Despite its potential for typhoid control, programmatic surveillance networks are scarce due to limited data linking environmental detection of *S. Typhi* with disease burden. As a host-restricted pathogen, *S. Typhi* is challenging to culture from WW, necessitating the intervention of molecular detection methods. However, regional variations in WW sample matrices lead to significant differences in molecular detection, and there is no consensus on laboratory processing methods and analytical techniques to model community disease burden [17].

Recognizing the disruption caused by COVID-19 lockdowns on healthcare-seeking behavior and surveillance measures, the study included a cross-sectional population-based serosurvey

which utilized a novel serological assay based on assessing IgG responses to Hemolysin E (HlyE) antigen in plasma/serum samples to estimate seroincidence, serving as a surrogate measure of enteric fever (typhoid and paratyphoid) burden during the pandemic period[18]. This technique allows for estimating population-level seroincidence using antibody decay rates fitted to a Bayesian hierarchical model, providing insight into exposure to *S. Typhi* and *S. Paratyphi A* over the preceding year. Previous comparison of seroincidence against clinical incidence from blood culture samples across four different countries revealed that population-level seroincidence rates closely mirrored the rank order of clinical incidences. The key advantage of this method lies in its ability to estimate disease exposure within populations, even from asymptomatic cases. This approach may offer a better correlation to ES detection than diagnosing infection solely based on overt clinical cases of enteric fever. However, this method also has limitations since HlyE cannot discriminate *S. Typhi* from *S. Paratyphi A*, and reinfections and long-term carriage of *S. Typhi* may modify the antibody responses in high exposure settings. A comparison of the detection of *S. Typhi* in ES samples and their relationship with the clinical incidence in two study settings has been reported [16,18].

This study sought to demonstrate the feasibility of ES as an alternative to clinical surveillance for typhoid in resource-limited settings and to compare environmental detection using grab and trap sampling techniques. We examined the association between *S. Typhi* in WW samples and clinical incidence captured through hospital-based surveillance using blood culture diagnosis alongside community-based seroincidence estimated via a cross-sectional survey. Our findings indicate that ES can complement traditional surveillance methods

effectively, providing valuable insights for public health interventions and disease monitoring in resource-limited settings.

## **Methods**

The study protocol, design, site selection, and laboratory assays have been described previously [19]. This multisite study was carried out in Vellore and Blantyre, Malawi. ES was integrated with ongoing hybrid surveillance for typhoid, including blood culture-based surveillance and a community serosurvey. This study was approved by the Institutional Review Board of Christian Medical College Vellore (IRB MIN 11170, A23 22-07-2020).

## **Study area**

Vellore city (12.92°N, 79.13°E), with a population of 613,000, is the administrative headquarters of the Vellore district, located on the Palar Riverbank in northeastern Tamil Nadu, India. Vellore has four zones (a total of 60 wards) that cover 87.915 km<sup>2</sup> and a population of approximately 500,000 (Government of India Census, 2011). Vellore experiences a semi-arid climate with high annual temperatures and relatively low rainfall. The city has three seasons: summer (March–July, temperatures > 40°C), rains (August–November, with both southwest and northeast monsoons), and winter (December–February, low of 15°C). The average annual rainfall is 1053 mm, with approximately 60% occurring during the rainy season. The surveillance area is within the Vellore Health and Demographic Surveillance System (VHDSS) maintained by Christian Medical College, Vellore.

## **ES site selection**



The sewage networks in the study area consist of shallow open-drain channels that drain upstream residential areas and eventually flow north into either a Sewage Treatment Plant (STP) or directly into the dry Palar riverbed. Candidate ES sites (sampling points) were systematically identified from the southern half of the city (280,000 population) at WW and sewage confluence points using a remote GIS-based approach with environmental data coupled with a novel selection process [16,19]. Forty sampling sites were selected to represent varying catchment population sizes and densities across the study area. The field team then visited these sites to assess accessibility, safety, and the perceived appropriateness of adequate depth and flow rate (Fig 1). Catchment areas for each sampling point were mapped through ground-truthing, identifying households connected to the drains contributing to each site. The catchments varied in population size from 233 to 28,036; those with less than 20 subjects were excluded from statistical analyses. Some of the catchments overlapped and were nested within larger catchments—among the 40 catchment areas, 32 were independent, five included 2–3 nested catchments (level 1), and three were large catchments with multiple nested catchments.

**Fig 1. Location of the study area in Vellore, India.**

## **Sample collection and processing**

At each ES site, grab (membrane filtration) and trap (Moore swab) samples were collected monthly for a year starting May 2021. Pilot studies were conducted at the site to compare the

recovery efficiencies of grab and trap samples, and both methods were employed for sample processing, as described in the protocol [19].

Moore swabs were prepared as described in a previous study [20] and were deployed 48 h before collection. Grab samples were collected concurrently with Moore swabs, with a recommended collection time between 6 am and 10 am. Moore swabs were incubated overnight in universal pre-enrichment (UPE) broth before filtration using 0.45 $\mu$ m membrane filters, and stored at  $-20^{\circ}\text{C}$  until DNA extraction. Approximately 1 L of grab samples were collected and filtered (0.45 $\mu$ m) after pre-filtering through a coffee filter, with filters eluted in Ringer's lactate. The eluate was then centrifuged and the pellet was stored at  $-20^{\circ}\text{C}$  [21]. Personal protective equipment was worn during sample collection, and infection control procedures were followed to minimize risks and prevent contamination.

Physicochemical parameters, including temperature, pH, oxidative reduction potential, dissolved oxygen, total suspended solids, salinity, and turbidity were measured and recorded using water quality probes (AquaProbe AP-2000; Aquaread Ltd. UK).

## **DNA extraction and PCR strategy**

DNA was extracted using the QIAamp® PowerFecal® Pro DNA Kit (Qiagen), eluted into 50 mL, and stored at  $-20^{\circ}\text{C}$ . Multiplex quantitative PCR (qPCR) with primers and probes targeting three genes (*ttr*, *staG*, and *tviB*) was used to detect *S. Typhi*. Samples with all three targets were considered positive for *S. Typhi* based on their demonstrated specificity for pan-*Salmonella* species (*ttr*), *S. Typhi*, non-typhoidal *Salmonella* serovars (*staG*), or *S. Typhi* alone (*tviB*). Samples positive for *ttr* and either *staG* or *tviB* alone were retested in a

singleplex qPCR for the negative target to improve the sensitivity of *S. Typhi* detection in the sampling matrix [22]. Additionally, a duplex qPCR was conducted for HF183 [23], a marker gene from a human-restricted *Bacteroides*, and an extraction/PCR positive control (Cy@5-QXL@670, Eurogentec) that was spiked into samples prior to extraction. Genome copy numbers were estimated using standard curves generated using gBlocks™ DNA fragments for each target (Integrated DNA Technologies). The limit of detection (LOD) was estimated using probit regression analysis for dilutions with a 95% probability of generating a proper amplification. Laboratory assay protocols are described in detail in protocols.io (<https://www.protocols.io/workspaces/typhoides>).

## **Clinical surveillance and estimation of incidence**

The clinical surveillance data were obtained from an ongoing passive hospital blood culture-based surveillance, which collected information from patients (> 6 months of age) diagnosed with typhoid fever, referred to as ‘Tier 2’ surveillance in the SEFI study. The clinical surveillance was planned as a continuation of the Tier 2 surveillance, with further details available in the protocol of the SEFI study [4].

## **Sero-survey and HlyE IgG ELISA**

A cross-sectional survey was conducted on 1,200 randomly selected study participants aged between 6 months and 15 years from 20 of the 40 ES catchment areas between September 30 and November 3, 2022. Blood samples were collected after obtaining parental consent.

Plasma was separated and stored at  $-70^{\circ}\text{C}$  until tested for anti- HlyE IgG by ELISA as previously described. Briefly, Nunc Maxisorb microplates were coated with purified HlyE (1 $\mu\text{g}/\text{mL}$ ) and plasma samples were added at 1:5000 dilution. Bound antibodies were detected with anti-human IgG conjugated with horseradish peroxidase (Jackson ImmunoResearch) and o-phenylenediamine color substrate. Kinetic readings of the plates were done at 450 nm and sample values were normalized to HlyE IgG monoclonal control included on each plate [18].

## **Weekly average rainfall measurements, depth, and flow**

Daily meteorological data on rainfall, humidity, and temperature were sourced from the Regional Meteorological Center, India Meteorological Department website for the study period [24]. WW drains were classified as ‘shallow,’ ‘medium’ or ‘deep’ if the depth of the WW levels were ‘<5 cm’, ‘5 to 50 cm’ and ‘>50 cm’ respectively. WW flow speeds were categorized into either ‘stagnant,’ ‘slow’ or ‘fast-flowing’ based on observation at the sampling time.

## **Ethics statement**

The Wastewater surveillance work has been approved by the Institutional Review Board of Christian Medical College, Vellore; CMC IRB Min No.11170. amended on 22 July 2020, IRB number A23 – 22.07.2020. Community serosurvey for estimating the seroincidence of Typhoid was approved by the Institutional Review Board of Christian Medical College, Vellore; CMC IRB Min No.12973 (OBSERVE) dated 24 June 2020. Formal informed

consent was obtained from the parent/guardian of all children for serosurvey, and written informed assent was obtained from children aged 11 to 15 years.

## **Statistical analysis**

Variations in WW physicochemical parameters across sites were analyzed using analysis of variance (ANOVA). A mixed-effects logistic regression was used to determine the association between *S. Typhi* detection and WW parameters, site characteristics, weekly average rainfall, catchment population, and HF183 levels. A random effect by location was included to account for repeated observations. Univariate analysis was used to determine the association with *S. Typhi* detection, followed by multivariate analysis for significant variables. Additionally, exploratory analyses of the spatial distribution of *S. Typhi* were also performed. Seroincidence for each catchment was estimated using maximum likelihood profiles for ELISA data against the fitted Bayesian hierarchical model described by Aiemjoy *et al* (2022), assuming Poisson-distributed time between incident infections [18]. The Bayesian model was adjusted to include only longitudinal antibody decay rates in children under 15 years of age, matching the sampled population. Overall and catchment-specific seroincidence rates were estimated as incidence cases per 100 person-years for the previous year. Seroincidence rates were estimated for the previous year. WW positivity for *S. Typhi* in grab and Moore swab samples was aggregated for each catchment. Furthermore, univariate and multivariate negative binomial regression analyses were performed to estimate the association between WW positivity and seroincidence, considering overdispersion in the WW data. Negative binomial regression adjusted for catchment population to estimate the association of seroincidence with overall WW positivity. All analyses were performed in R

version 4.3.2 [25] using the statistical packages (ggplot2, data.table, sf, MASS, lme4) [26–30]. Geospatial analysis was performed within ArcMap v10.82 [31] using spatial analysis tools.

## Results

### ***S. Typhi* in WW samples**

Out of the 1037 samples collected, 520 were grab samples processed using the membrane filtration method and 517 using Moore swabs. A total of 39 (7.50%) grab and 79 (15.30%) Moore swab samples tested positive for *S. Typhi* (*ttr*, *staG*, and *tviB* were all positive). *S. Typhi* was detected in the samples collected from 14 sites during the surveillance period, with an overall positivity rate of 11.40%. The proportion of detection varied by sampling site; membrane filtration showed a median positivity of 7.69% positivity for all catchment levels with a variance of 3.20%.

A distinct spike in molecular detection of *S. Typhi* was observed during the monsoon months of August – November, correlating with average rainfall in Vellore (Fig 2). Rainfall during the sampling week was significantly associated with *S. Typhi* positivity for membrane filtration (adjusted odds ratio [aOR]: 2.56, 95% confidence interval [CI]:1.02–6.41), and Moore swab samples (aOR: 20.3, 95% CI: 1.01–3.97). The membrane filtration technique showed significantly elevated positivity in monsoon WW samples (aOR, 2.99; 95% CI, 1.03–8.47; Table 1). *S. Typhi* positivity in WW during the monsoon months (August–November) was the highest at 16.76 % (58/346), compared to 9.77% (25/256) and 8.05% (35/435) during the winter and summer months, respectively (Fig 3).

**Fig 2. *Salmonella* Typhi positivity in wastewater (WW) and average monthly rainfall during the study period.**

**Table 1. Mixed-effects logistic regression models predicting *S. Typhi* detection in ES with wastewater and catchment area characteristics.**

|                                          | Membrane Filtration          |                                  | Moore swab                  |                                  |
|------------------------------------------|------------------------------|----------------------------------|-----------------------------|----------------------------------|
|                                          | OR<br>(95% CI), p-<br>value  | Adjusted OR<br>(95% CI), p-value | OR<br>(95% CI), p-<br>value | Adjusted OR<br>(95% CI), p-value |
| <b>Average<br/>temperature</b>           | 0.98<br>(0.79–1.2),<br>0.854 | -                                | -                           | -                                |
| <b>Average pH</b>                        | 0.38<br>(0.08–1.66),<br>0.20 | -                                | -                           | -                                |
| <b>Oxidative reductive<br/>potential</b> | 0.99<br>(0.99–1), 0.59       | -                                | -                           | -                                |
| <b>Dissolved oxygen</b>                  | 1.02<br>(0.75–1.39),<br>0.87 | -                                | -                           | -                                |
| <b>Total dissolved<br/>solids</b>        | 0.99<br>(0.99–1), 0.60       | -                                | -                           | -                                |

|                                  |                                  |                                 |                                  |                                      |
|----------------------------------|----------------------------------|---------------------------------|----------------------------------|--------------------------------------|
| <b>Turbidity</b>                 | 1<br>(0.99–1), 0.33              | -                               | -                                | -                                    |
| <b>Rainfall in sampling week</b> | 3.57*<br>(1.68 – 7.60),<br>0.001 | 2.56*<br>(1.02 – 6.42)<br>0.046 | 2.09*<br>(1.16 – 3.76),<br>0.014 | 2.00*<br>(1.01–3.97) 0.047           |
| <b>HF183 (log)</b>               | 1.46<br>(0.98–2.19),<br>0.065    | 1.67<br>(0.95 – 2.92)<br>0.074  | 3.19*<br>(1.68–6.06)<br><0.001   | 3.08*<br>(1.59 – 5.95)<br>0.001      |
| <b>Population (log)</b>          | 2.04*<br>(1.01–4.14),<br>0.048   | 1.62<br>(0.75 – 3.51) 0.22      | 3.84*<br>(1.90–7.77)<br><0.001   | 4.67*<br>(1.97 – 11.04) p<br><0.0001 |
| <b>Faster flow speed</b>         | 9.46*<br>(1.18–75.27),<br>0.03   | 6.85<br>(0.74 – 63.87)<br>0.091 | 1.16<br>(0.42–3.2) 0.76          | 0.71<br>(0.23 – 2.19)<br>0.551       |
| <b>Drain depth (0.50 cm)</b>     | 2.68<br>(0.96–7.47),<br>0.06     | 2.59<br>(0.79–8.52) 0.118       | 1.63<br>(0.68–3.91)<br>0.27      | 1.18<br>(0.47–2.93) 0.728            |
| <b>Monsoon</b>                   | 5.85*<br>(2.33–14.67),<br><0.001 | 2.99*<br>(1.06–8.49)<br>0.039   | 2.39*<br>(1.23–4.67)<br>0.010    | 1.29<br>(0.60–2.79) 0.516            |
| <b>Winter</b>                    | 1.25<br>(0.393–3.962),<br>0.708  | 0.69<br>(0.181–2.642)<br>0.589  | 1.36<br>(0.646–2.848)<br>0.421   | 1.03<br>(0.462–2.287)<br>0.947       |

OR, Odds ratio; CI, Confidence interval; \*p-value < 0.05



**Fig 3. *Salmonella typhi* detection at wastewater sampling sites during different seasons of the year during (A) summer months (March–July), (B) monsoon months (August–November), and (C) winter months (December–February).**

## **Wastewater and sampling site characteristics**

All water quality parameters, except temperature, varied significantly between sites (S1 Table). A repeated-measures ANOVA revealed significant within-site variations over the year, but between-site differences were not statistically significant. Sites were characterized by flow speed during sample collection and Moore swab deployment. Of 1022 samples, 793 (77.59%) were from fast-flowing sewage, with 13.50% positivity for *S. Typhi*, and 229 (22.40%) from slow-flowing sewage with 4.40% positivity (Chi square = 10.44,  $p = 0.001$ ).

Mixed-effects logistic regression showed no significant association between the WW physicochemical parameters and the detection of *S. Typhi*. Although the depth of the sewage channel and faster flow speed were significantly associated with detection in the unadjusted analysis, they did not show significant differences after adjusting for confounders in the model. Log-transformed HF183 in sewage (genome copies/ $\mu\text{L}$ ) was associated with a significant increase in the probability of detection in Moore swab samples (aOR, 3.08; 95% CI: 1.59–5.93). Upstream catchment population size was also significantly associated with WW positivity for Moore swab samples (aOR, 4.67; 95% CI: 1.97–11.04) (Table 1). A mixed-effects linear regression indicated that HF183 copy numbers were unaffected by

weekly average rainfall ( $p = 0.82$ ) and log population ( $p = 0.95$ ). Compared to grab samples, HF183 detection was significantly higher in Moore swab samples (OR 21.90,  $p < 0.01$ ).

## **Hospital cases of typhoid fever during the study period**

Eleven cases of blood culture-confirmed enteric fever were documented from the study area in the sentinel hospitals during the study. The pattern was sporadic concerning seasonality and spatial clustering was not observed as described earlier [16].

## **Seroincidence estimation for ES catchments**

A total of 1215 children (628 females and 587 males) were recruited for the serosurvey, of which 19.18% were aged upto two years, 21.32% were 3–5 years old, 33.03% were 6–10 years old, and 26.46% were 11–15 years old.

The estimated seroincidence in this study population was 10.40/100 person-years (py) (95% CI: 9.61–11.46/100 py). Seroincidence rates varied in the non-nested, independent catchments from 6.10 to 24.60/100 py; while those in the larger catchment levels approximated the overall seroincidence estimate, ranging from 8.30 to 10.50/100 py except for one catchment that had a high estimate of 20.60/100 py (Fig 4, S2 Table, S1 Fig).

**Fig 4. *Salmonella* Typhi positivity in wastewater across smaller, medium-sized, and larger catchment areas**

## Association of seroincidence with detection of *S. Typhi* in wastewater

Negative binomial regression analysis was performed to account for overdispersion in the data to estimate the association between seroincidence and overall WW positivity, adjusting for the population size of the catchment areas. The model for grab sample positivity as a response to seroincidence with the catchment population as an additional predictor provided the best fit (LLR = -29.11). *S. Typhi* detections in WW positively correlated with seroincidence (incidence rate ratio (IRR) 1.14 (95% CI: 1.07–1.23,  $p < 0.001$ ) for grab samples and 1.10 (95% CI: 1.02–1.20,  $p = 0.032$ ) for Moore swabs; Table 2). The upstream catchment population was associated with the detection of *S. Typhi*; however, this association became non-significant when seroincidence was considered (Table 2).

**Table 2. Typhoid seroincidence predicting ES positivity.**

|                              | Membrane filtration    |                                 | Moore Swab             |                                 | Overall             |                                 |
|------------------------------|------------------------|---------------------------------|------------------------|---------------------------------|---------------------|---------------------------------|
|                              | <i>IRR</i><br>(95% CI) | <i>adjusted IRR</i><br>(95% CI) | <i>IRR</i><br>(95% CI) | <i>Adjusted IRR</i><br>(95% CI) | <i>IRR</i> (95% CI) | <i>Adjusted IRR</i><br>(95% CI) |
| <b>Sero incidence/100 py</b> | 1.15<br>(1.07–1.23)    | 1.14<br>(1.07–1.23)             | 1.09<br>(0.998–1.19)   | 1.10<br>(1.02–1.20)             | 1.12<br>(1.03–1.21) | 1.13<br>(1.04–1.22)             |
|                              | <0.001                 | <0.001                          | 0.053                  | 0.018                           | 0.009               | 0.004                           |

---

|                           |        |             |             |             |             |             |
|---------------------------|--------|-------------|-------------|-------------|-------------|-------------|
| <b>Catchment</b>          | 1.75   | 0.90        | 2.43        | 1.66        | 2.28        | 1.47        |
| <b>population</b>         | (0.94– | (0.48–1.67) | (1.45–4.06) | (0.97–2.85) | (1.35–3.85) | (0.86–2.52) |
| <b>(log<sub>10</sub>)</b> | 3.24)  | 0.734       | 0.001       | 0.066       | 0.002       | 0.157       |
|                           | 0.077  |             |             |             |             |             |

---

CI, Confidence interval; IRR, Incidence rate ratios

## Discussion

This study aimed to demonstrate the effectiveness of ES of WW as an alternative to blood culture-based surveillance for quantifying typhoid burden in resource-limited settings. In an earlier case-control study, environmental samples from households of participants diagnosed with typhoid were processed using both grab sampling and Moore swabs [32]. The odds ratio (OR) of WW positivity from typhoid-positive households was 1.34 for Moore swabs and 4.17 for grab sampling using the Bag-mediated filtration system (BMFS). However, the pandemic and ensuing lockdowns largely modified health-seeking behaviour, and the number of cases of blood culture-confirmed typhoid was approximately a tenth of what was seen during 2017 – 2020 in the same region. The current study aimed to leverage ongoing clinical surveillance for typhoid to examine the association between community WW positivity and disease burden using a detailed sampling scheme and systematic, repeated measurements of *S. Typhi* detection from sites with a defined upstream catchment.

The positivity of Moore swabs (15.30%) was two-fold higher than that of grab samples (7.50%). This finding aligns with the findings of a previous study [32], where grab sampling using the BMFS method showed 3.42% positivity, and Moore swabs showed 8.67%. Grab samples reflect the *S. Typhi* status in WW at collection time, while Moore

swabs capture particulates and organisms during deployment. Moore swab data, inherently non-quantitative, are more suitable when detection sensitivity is crucial, such as estimating disease burden post-public health intervention. During outbreaks, increased genome copy numbers can signal above-expected endemic or seasonal levels. Studies indicate Moore swab sensitivity inversely correlates with sewer size and directly correlates with the number of swabs deployed [17,33]. Therefore, sample processing methods should be chosen based on specific use cases.

The seasonality of blood culture-confirmed enteric fever was indiscernible due to limited clinical case data. Previously, the SEFI study had identified variations in clinical case detection over three years in Vellore, with no correlation to the monsoon months [4]. Another report from the same area noted a typhoid outbreak from April to June 2019 during the summer [34]. A global review [35] found that seasonality in the occurrence of typhoid cases and its association with rainfall was more pronounced farther from the equator, with peaks from May and October in Asia. However, this review included only one study from India, indicating the need for more comprehensive and systematic research on typhoid seasonality in the country.

The present study revealed a notable increase in WW positivity trends before the wetter months for both grab and trap samples. The effect of variations in the physicochemical characteristics of WW and molecular detection has been established, and the Centers for Disease Control and Prevention recommends matrix recovery controls and fecal normalization for WW surveillance for SARS-CoV-2 [36], but the actual association with positivity remains unclear. In the present study, significant between- and within-site variations were observed in these characteristics, but they did not significantly correlate with

the detection of *S. Typhi* in WW grab samples. This may be due to the inherently low levels of *S. Typhi* in WW, contrasting with viruses like SARS-CoV-2, which show a clearer association between WW characteristics and positivity.

The study revealed a significant association between detection and upstream catchment population for both grab and Moore swab sampling, with a stronger association for Moore swab positivity than that for grab sampling. This was anticipated since larger populations exhibit higher typhoid event rates. Continuous filtration through Moore swab sampling is more pertinent for estimating typhoid burden when sensitivity is crucial, rather than quantifying shedding during outbreaks or high incidence periods [10].

Normalization of WW pathogen detection by levels of fecal contamination must account for variations in catchment populations, sampling networks, and dilution factors like rainfall and flow rates. HF183 levels, indicating fecal contamination, correlated with *S. Typhi* detection in trap samples but not in grab samples. We found no correlation between HF183 levels and upstream catchment population or rainfall. This lack of association in our setting may result from dilution effects, where higher fecal contamination in densely populated areas is diluted by increased sewage flow, leaving HF183 levels unaffected by upstream population, or a saturation effect, where qPCR is inhibited by high *Bacteroides* spp. levels, yielding similar values above a threshold. A recent study also showed HF183 levels did not correlate with population density, nor was detection frequency affected by rainfall [37]. Together, these studies indicate that alternative markers of human fecal contamination, such as CrAssphage or pepper mild mottle virus, which correlate with flow and catchment populations, should be considered.

During the SARS-CoV-2 pandemic, community lockdowns restricted passive hospital-based surveillance, affecting clinical incidence estimates and healthcare-seeking behaviours. The annual seroincidence of typhoid from the survey was 10.40/100 py, approximately ten times higher than the incidence of BC-confirmed disease reported in the SEFI study. This discrepancy may result from seroincidence capturing both subclinical and clinical cases, suggesting that seroincidence could more effectively measure vaccine impacts on typhoid transmission. A previous study estimated seroincidence rates from cross-sectional surveys of children in four regions and reported seroincidence rates of 17.60/100 py in Karachi, Pakistan and 41.20/100 py in Dhaka, Bangladesh [18]. Furthermore, the study reported that while the clinical incidence of typhoid fever increased with age, seroincidence did not, likely due to multiple exposures and altered immune decay in different age groups [18]. Therefore, further studies using this surveillance method are required for further comparison. Seroincidence varied across catchment areas, suggesting potential transmission hotspots and emphasizing the need for selecting appropriately sized populations for surveillance studies.

WW positivity via grab sampling exhibited a median membrane filtration positivity of 7.69%, irrespective of catchment size. Moore swab positivity was influenced by upstream catchment size, showing median positivity of 7.69% in non-nested catchments, 15.40% and 38.46% in level 1 and larger catchments respectively. Similar to HF183 detection, this may be due to a dilution effect, as grab sample positivity is balanced by increased flow at larger catchments, whereas Moore swabs collect more bacteria due to extended sewage exposure. The correlation between seroincidence and grab sample positivity was stronger than that between Moore swab positivity, even though Moore swabs showed twice the positivity.

These associations remained unaffected after controlling for the catchment populations in the model.

This study is among the first to estimate the association between ES positivity for *S. Typhi* and clinical incidence or seroincidence in the community. The feasibility of WW surveillance in LMICs has been shown for SARS-CoV-2 [38,39]. We aimed to standardize methods for detecting *S. Typhi* in WW and demonstrated the feasibility of scaling up ES. Clinical surveillance for illnesses with low incidence and nonspecific symptoms often underestimates incidence due to missed asymptomatic infections and carriers. The methods discussed—cross-sectional serosurveys and ES—offer alternative strategies for estimating burden in resource-limited settings where intensive clinical surveillance is impractical.

This study has several limitations. The clinical incidence estimation is constrained by altered healthcare-seeking behaviors in the community due to the COVID-19 pandemic, which, along with lockdowns, may have also altered typhoid transmission dynamics. The HlyE IgG is not specific to *S. Typhi* and can also be increased by *S. Paratyphi A* infection, which has not been assessed in the present study. Serosurvey was not carried out in all catchments of the study area but only in half the catchments since a comparative analysis was not initially planned. Nonalignment in WW sampling and sero-survey timing could have affected the study findings. Seroincidence estimation assumes that antibody decay rates remain constant for a group while asymptomatic infection or reinfection may modify antibody responses. Long-term carriage may also modify responses, however, HlyE was not identified in an immunoscreen of *S. Typhi* carriers.



## Conclusions

Despite the study's limitations, including the focus on a single region and the need for more extensive sampling and longitudinal data, it provides valuable insights into using ES and seroincidence surveys for monitoring and responding to typhoid outbreaks. Future research should aim to expand these methodologies across diverse geographic and seasonal contexts to strengthen their applicability and effectiveness in typhoid control efforts.

## Acknowledgements

We want to acknowledge Annai Gunasekaran and Senthil Kumar for their contributions in coordinating the field components and Nirmal Kumar's contribution to the laboratory work.

## Author Contributions

**Conceptualization:** Dilip Abraham, Christopher Uzzell, Nicholas Grassly, Venkata Raghava Mohan

**Methodology** - Dilip Abraham, Lalithambigai Kathiresan, Kristen Aiemjoy, Richelle C.

Charles, Rajan Srinivasan, Catherine Troman, Elizabeth Gray, Jacob John, Balaji

Veeraraghavan, Nicholas Grassly, Venkata Raghava Mohan

**Formal Analysis-** Dilip Abraham, Lalithambigai Kathiresan, Dilesh Kumar, Venkata

Raghava Mohan

**Validation** - Dilip Abraham, Lalithambigai Kathiresan, Nicholas Grassly, Venkata Raghava

Mohan

**Writing** – original draft - Dilip Abraham, Lalithambigai Kathiresan, Venkata Raghava

Mohan

**Writing – review & editing** - Dilip Abraham, Lalithambigai Kathiresan, Kristen Aiemjoy,

Richelle C. Charles, Dilesh Kumar, Rajan Srinivasan, Catherine Troman, Elizabeth Gray,

Christopher Uzzell, Jacob John, Balaji Veeraraghavan, Nicholas Grassly, Venkata Raghava

Mohan

## **Funding**

This work was supported by the Bill and Melinda Gates Foundation (grant number INV-002381); the Medical Research Council (MRC) Center for Global Infectious Disease Analysis (grant number MR/R015600/1), jointly funded by the UK MRC and the UK Foreign, Commonwealth, and Development Office (FCDO) under the MRC/FCDO Concordat agreement; and the EDCTP2 program supported by the European Union.

The funders had no role in study design, data collection and analysis, decision to publish, or preparation of the manuscript.

## **References**

1. Stanaway JD, Reiner RC, Blacker BF, Goldberg EM, Khalil IA, Troeger CE, et al. The global burden of typhoid and paratyphoid fevers: a systematic analysis for the Global Burden of Disease Study 2017. *Lancet Infect Dis.* 2019 Apr 1;19(4):369–81.

2. John J, Van Aart CJC, Grassly NC. The Burden of Typhoid and Paratyphoid in India: Systematic Review and Meta-analysis. *PLoS Negl Trop Dis*. 2016 Apr;10(4):e0004616.
3. Srinivasan P, Lawa HR, Rosado JL, Al Mamun A, Khatun M, Santos JI, et al. Household and personal factors are sources of heterogeneity in intestinal parasite clearance among Mexican children 6-15 months of age supplemented with vitamin A and zinc. *Acta Trop*. 2016 Apr;156:48–56.
4. John J, Bavdekar A, Rongsen-Chandola T, Dutta S, Gupta M, Kanungo S, et al. Burden of Typhoid and Paratyphoid Fever in India. *N Engl J Med*. 2023 Apr 20;388(16):1491–500. doi: 10.1056/NEJMoa2209449.
5. Klemm EJ, Shakoor S, Page AJ, Qamar FN, Judge K, Saeed DK, et al. Emergence of an Extensively Drug-Resistant *Salmonella enterica* Serovar Typhi Clone Harboring a Promiscuous Plasmid Encoding Resistance to Fluoroquinolones and Third-Generation Cephalosporins. *mBio*. 2018 Mar 7;9(1):e00105-18. doi: 10.1128/mBio.00105-18.
6. Shaikh OA, Asghar Z, Aftab RM, Amin S, Shaikh G, Nashwan AJ. Antimicrobial-resistant strains of *Salmonella typhi*: The role of illicit antibiotics sales, misuse, and self-medication practices in Pakistan. *J Infect Public Heal*. 2023 Oct 1;16(10):1591–7. doi: 10.1016/j.jiph.2023.08.003.
7. World Health Organization null. Typhoid vaccines: WHO position paper, March 2018–Recommendations. *Vaccine*. 2019 Jan 7;37(2):214–6. doi: 10.1016/j.vaccine.2018.04.022.

8. Hancuh M, Walldorf J, Minta AA, Tevi-Benissan C, Christian KA, Nedelec Y, et al. Typhoid Fever Surveillance, Incidence Estimates, and Progress Toward Typhoid Conjugate Vaccine Introduction — Worldwide, 2018–2022. *MMWR Morb Mortal Wkly Rep.* 2023 Feb 17;72(7):171–6. doi: 10.15585/mmwr.mm7207a2.
9. Mukhopadhyay B, Sur D, Gupta S, Ganguly N. Typhoid fever: Control & challenges in India. *Indian J Med Res.* 2019;150(5):437. doi: 10.4103/ijmr.IJMR\_411\_18.
10. Sapkota J, Roberts T, Basnyat B, Baker S, Hampton LM, Dittrich S. Diagnostics for Typhoid Fever: Current Perspectives and Future Outlooks for Product Development and Access. *Open Forum Infect Dis.* 2023 Jun 2;10(Supplement\_1):S17–20. doi: 10.1093/ofid/ofad120.
11. Andrews JR, Yu AT, Saha S, Shakya J, Aiemjoy K, Horng L, et al. Environmental Surveillance as a Tool for Identifying High-risk Settings for Typhoid Transmission. *Clin Infect Dis.* 2020 Jul 29;71(Supplement\_2):S71–8. doi: 10.1093/cid/ciaa513.
12. Hovi T, Shulman LM, Van Der Avoort H, Deshpande J, Roivainen M, et al. Role of environmental poliovirus surveillance in global polio eradication and beyond. *Epidemiol Infect.* 2012 Jan;140(1):1–13. doi: 10.1017/S095026881000316X.
13. McClary-Gutierrez JS, Mattioli MC, Marcenac P, Silverman AI, Boehm AB, Bibby K, et al. SARS-CoV-2 Wastewater Surveillance for Public Health Action. *Emerg Infect Dis.* 2021 Sep;27(9):e210753. doi: 10.3201/eid2709.210753.

14. Li L, Haak L, Carine M, Pagilla KR. Temporal assessment of SARS-CoV-2 detection in wastewater and its epidemiological implications in COVID-19 case dynamics. *Heliyon*. 2024 Apr 9;10(8):e29462. doi: 10.1016/j.heliyon.2024.e29462.
15. Rigby J, Elmerhebi E, Diness Y, Mkwanda C, Tonthola K, Galloway H, et al. Optimized methods for detecting Salmonella Typhi in the environment using validated field sampling, culture and confirmatory molecular approaches. *J Appl Microbiol*. 2022 Feb;132(2):1503–17. doi: 10.1111/jam.15237.
16. Uzzell CB, Abraham D, Rigby J, Troman CM, Nair S, Elviss N, et al. Environmental Surveillance for Salmonella Typhi and its Association With Typhoid Fever Incidence in India and Malawi. *J Infect Dis*. 2023 Sep 29;jiad427. doi: 10.1093/infdis/jiad427.
17. Matrajt G, Lillis L, Meschke JS. Review of Methods Suitable for Environmental Surveillance of Salmonella Typhi and Paratyphi. *Clin Infect Dis*. 2020 Jul 29;71(Supplement\_2):S79–83. doi: 10.1093/cid/ciaa487.
18. Aiemjoy K, Seidman JC, Saha S, Munira SJ, Islam Sajib MS, Sium SMA, et al. Estimating typhoid incidence from community-based serosurveys: a multicohort study. *Lancet Microbe*. 2022 Aug;3(8):e578–87. doi: 10.1016/S2666-5247(22)00114-8.
19. Uzzell CB, Troman CM, Rigby J, Raghava Mohan V, John J, Abraham D, et al. Environmental surveillance for Salmonella Typhi as a tool to estimate the incidence of typhoid fever in low-income populations. *Wellcome Open Res*. 2023 Jan 6;8:9. doi: 10.12688/wellcomeopenres.17687.1.

20. Zhou N, Ong A, Fagnant-Sperati C, Harrison J, Kossik A, Beck N, et al. Evaluation of Sampling and Concentration Methods for *Salmonella enterica* Serovar Typhi Detection from Wastewater. *Am J Trop Med Hyg.* 2023 Feb 6;108(3):482–91. doi: 10.4269/ajtmh.22-0427..
21. Sikorski MJ, Levine MM. Reviving the “Moore Swab”: a Classic Environmental Surveillance Tool Involving Filtration of Flowing Surface Water and Sewage Water To Recover Typhoidal *Salmonella* Bacteria. Elkins CA, editor. *Appl Environ Microbiol.* 2020 Jun 17;86(13):e00060-20. doi: 10.1128/AEM.00060-20.
22. Nair S, Patel V, Hickey T, Maguire C, Greig DR, Lee W, et al. Real-Time PCR Assay for Differentiation of Typhoidal and Nontyphoidal *Salmonella*. *J Clin Microbiol.* 2019 Aug;57(8):e00167-19. doi: 10.1128/JCM.00167-19.
23. Green HC, Haugland RA, Varma M, Millen HT, Borchardt MA, Field KG, et al. Improved HF183 Quantitative Real-Time PCR Assay for Characterization of Human Fecal Pollution in Ambient Surface Water Samples. *Appl Environ Microbiol.* 2014 May;80(10):3086–94. doi: 10.1128/AEM.04137-13.
24. IMD Chennai | Today's Weather Report [Internet]. [cited 2024 Mar 21]. Available from: [https://mausam.imd.gov.in/imd\\_latest/contents/Todaysweather\\_mc.php?id=26](https://mausam.imd.gov.in/imd_latest/contents/Todaysweather_mc.php?id=26)
25. R Core Team. R: A Language and Environment for Statistical Computing [Internet]. Vienna, Austria: R Foundation for Statistical Computing; 2023. Available from: <https://www.R-project.org/>

26. Wickham H. *ggplot2: Elegant Graphics for Data Analysis* [Internet]. Springer-Verlag New York; 2016. Available from: <https://ggplot2.tidyverse.org>
27. Pebesma E. Simple Features for R: Standardized Support for Spatial Vector Data. *The R J*. 2018;10(1):439–46.
28. Dowle M, Srinivasan A. *data.table: Extension of `data.frame`* [Internet]. 2021. Available from: <https://CRAN.R-project.org/package=data.table>
29. Venables WN, Ripley BD. *Modern Applied Statistics with S* [Internet]. Fourth. New York: Springer; 2002. Available from: <https://www.stats.ox.ac.uk/pub/MASS4/>
30. Bates D, Machler M, Bolker B, Walker S. Fitting Linear Mixed-Effects Models Using lme4. *J Stat Softw*. 2015;67(1):1–48. doi: 10.18637/jss.v067.i01
31. Redlands C ESRI. *ArcGIS Desktop: Release 10*. 2011.
32. Giri S, Mohan VR, Srinivasan M, Kumar N, Kumar V, Dhanapal P, et al. Case-Control Study of Household and Environmental Transmission of Typhoid Fever in India. *J Infect Dis*. 2021 Nov 15;224(Supplement\_5): S584–92. doi: 10.1093/infdis/jiab378.
33. Sears SD, Ferreccio C, Levine MM. Sensitivity of Moore sewer swabs for isolating *Salmonella typhi*. *Appl Environ Microbiol*. 1986 Feb;51(2):425–6. doi: 10.1128/aem.51.2.425-426.1986.
34. Srinivasan M, Sindhu KN, Kumar JS, Ramasamy RK, Pragasam AK, Aasaithampi P, et al. Outbreak of Typhoid Fever in Children of Urban Vellore: A Report from the

Surveillance for Enteric Fever in India Cohort. *Am J Trop Med Hyg.* 2022 Jul 13;107(1):82–5. doi: 10.4269/ajtmh.21-0593..

35. Saad NJ, Lynch VD, Antillón M, Yang C, Crump JA, Pitzer VE. Seasonal dynamics of typhoid and paratyphoid fever. *Sci Rep.* 2018 May 2;8(1):6870. doi: 10.1038/s41598-018-25234-w.

36. Center for Disease Surveillance. Wastewater Surveillance Testing Methods–National Wastewater Surveillance System–CDC [Internet]. 2023 [cited 2024 Mar 16]. Available from: <https://www.cdc.gov/nwss/testing.html>

37. Shahin SA, Keevy H, Dada AC, Gyawali P, Sherchan SP. Incidence of human associated HF183 Bacteroides marker and E. coli levels in New Orleans Canals. *Sci Total Environ.* 2022 Feb 1;806(Pt 1):150356. doi: 10.1016/j.scitotenv.2021.150356.

38. Rogawski McQuade ET, Blake IM, Brennhofer SA, Islam MO, Sony SSS, Rahman T, et al. Real-time sewage surveillance for SARS-CoV-2 in Dhaka, Bangladesh versus clinical COVID-19 surveillance: a longitudinal environmental surveillance study (December, 2019–December, 2021). *Lancet Microbe.* 2023 Jun;4(6):e442-e451. doi: 10.1016/S2666-5247(23)00010-1.

39. Lamba S, Ganesan S, Daroch N, Paul K, Joshi SG, Sreenivas D, et al. SARS-CoV-2 infection dynamics and genomic surveillance to detect variants in wastewater – a longitudinal study in Bengaluru, India. *Lancet Reg Health Southeast Asia.* 2023 Apr;11:100151. doi: 10.1016/j.lansea.2023.100151.



## **Supporting information captions**

**S1 Table.** Physico-chemical characteristics of wastewater – between-site and within-site variation.

**S2 Table.** Serosurvey participants and seroincidence by catchment areas of sampling sites.

**S1 Fig.** Wastewater positivity and seroincidence in catchment areas.

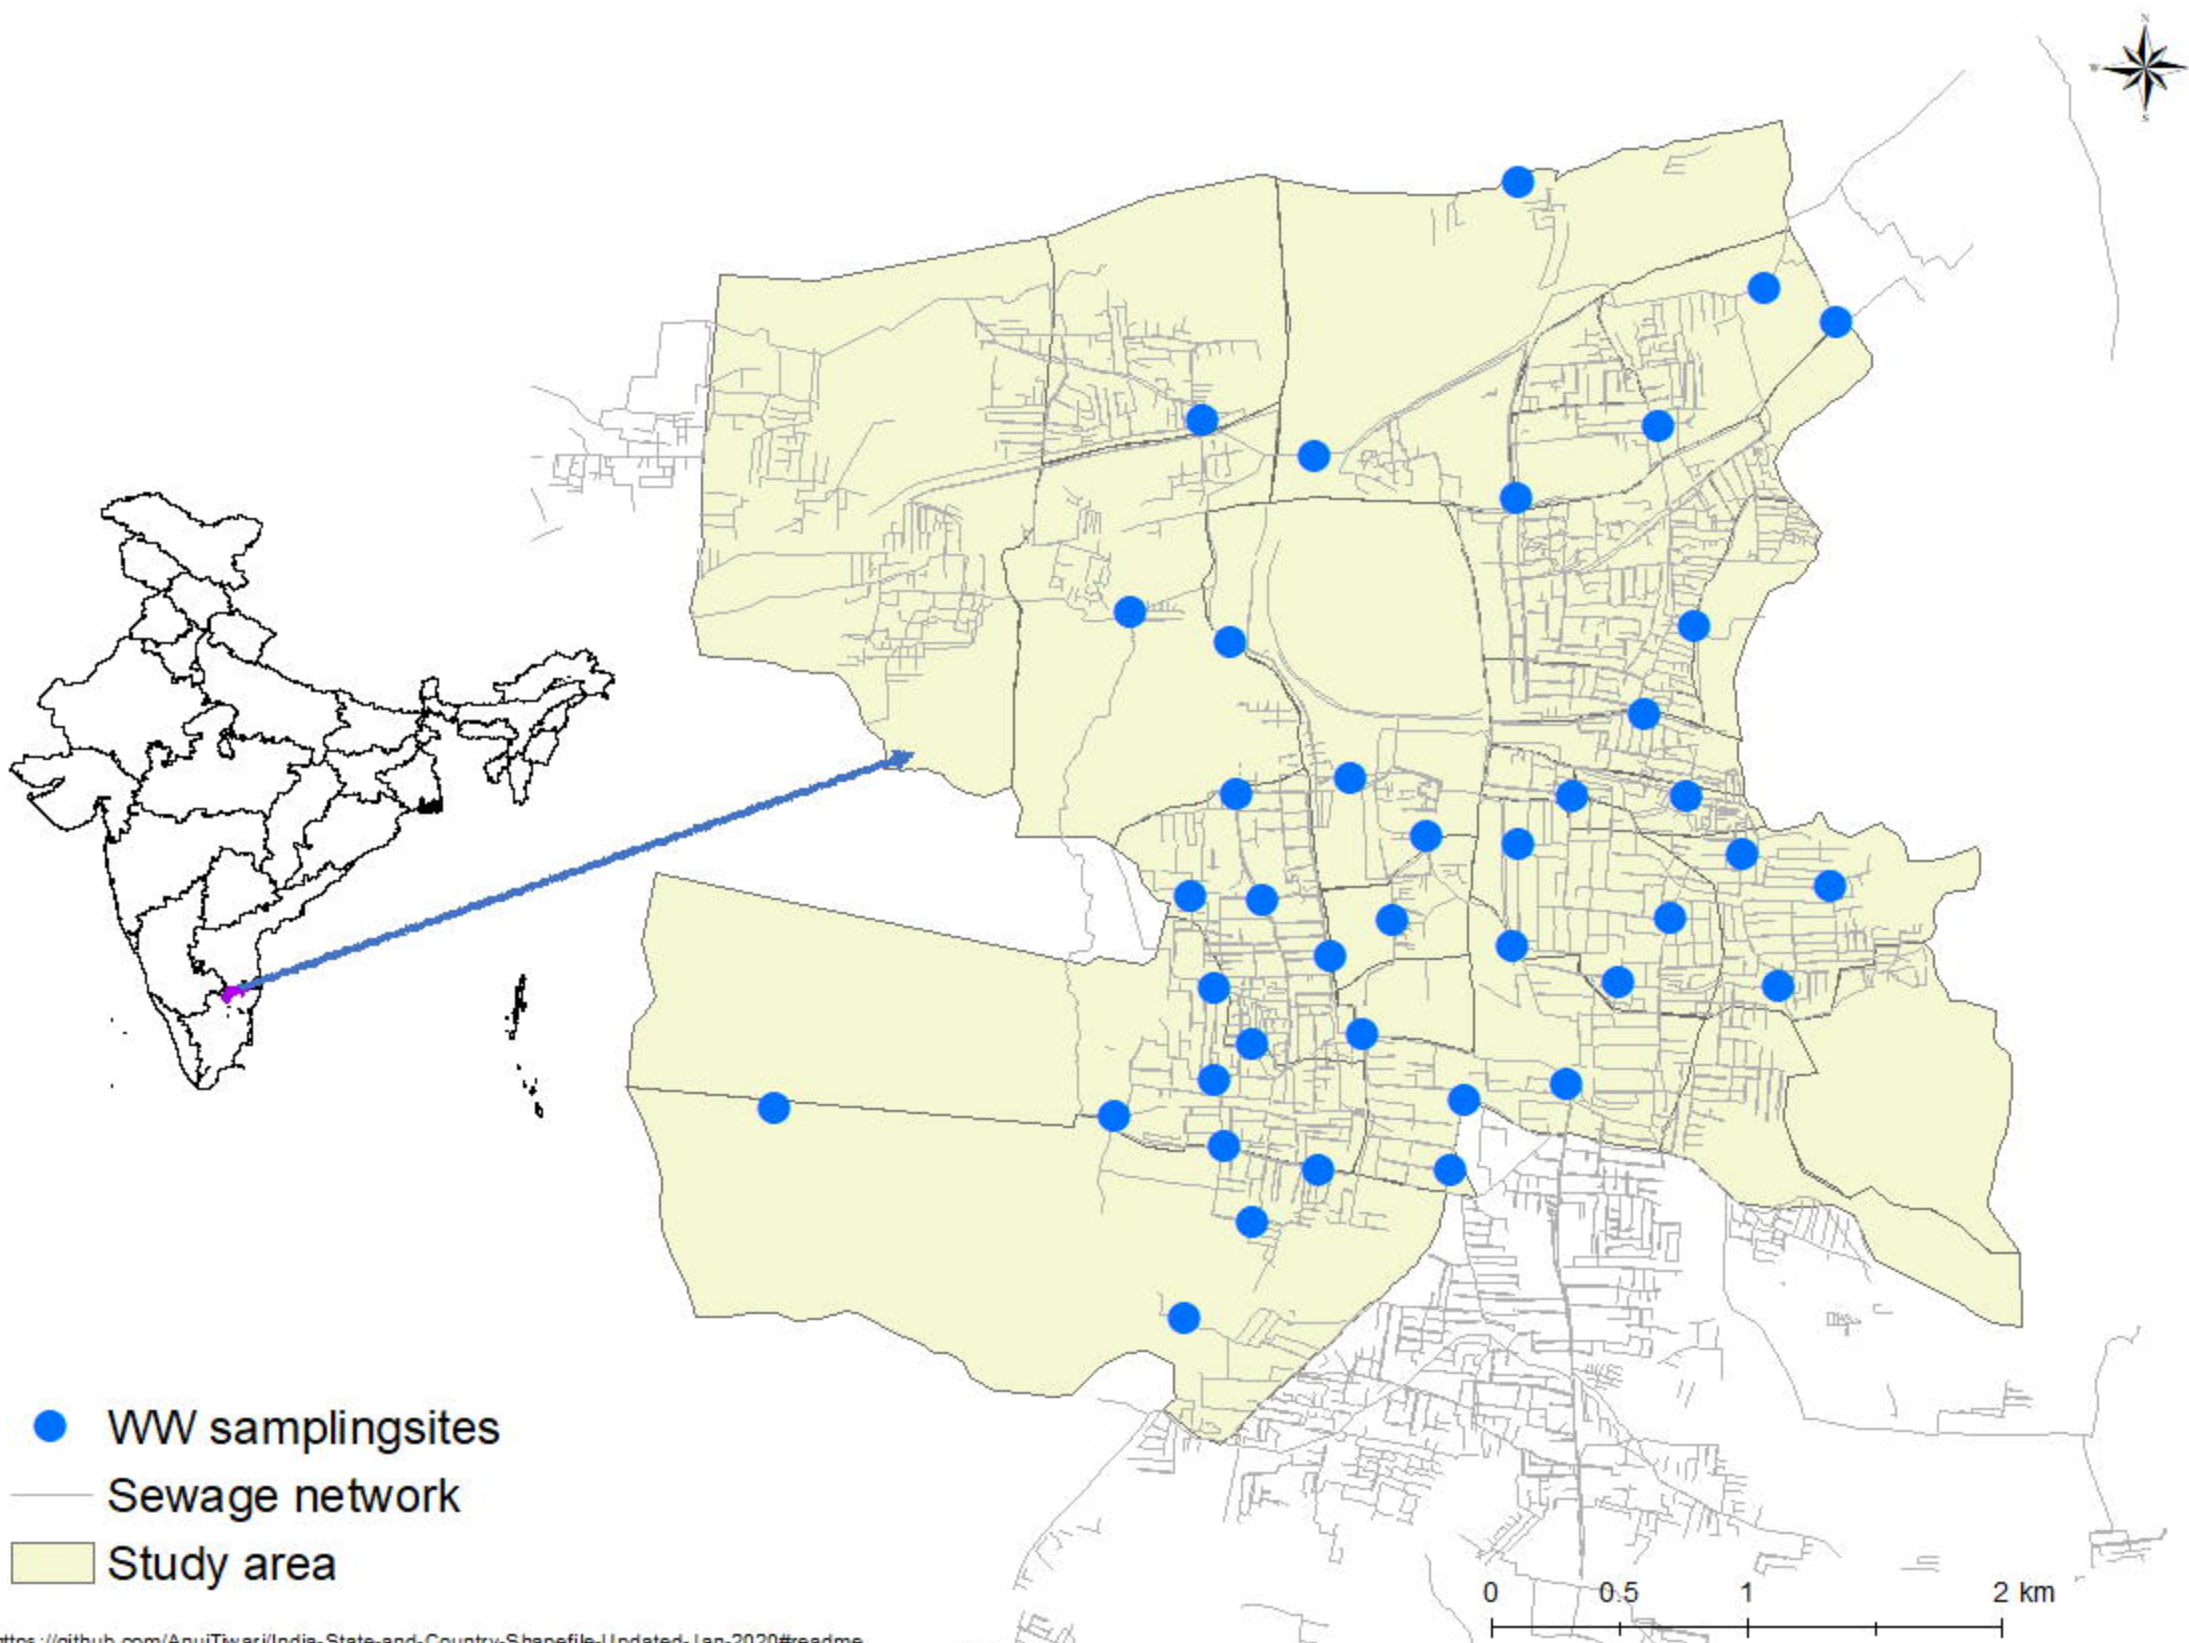

- WW samplingsites
- Sewage network
- Study area

0 0.5 1 2 km

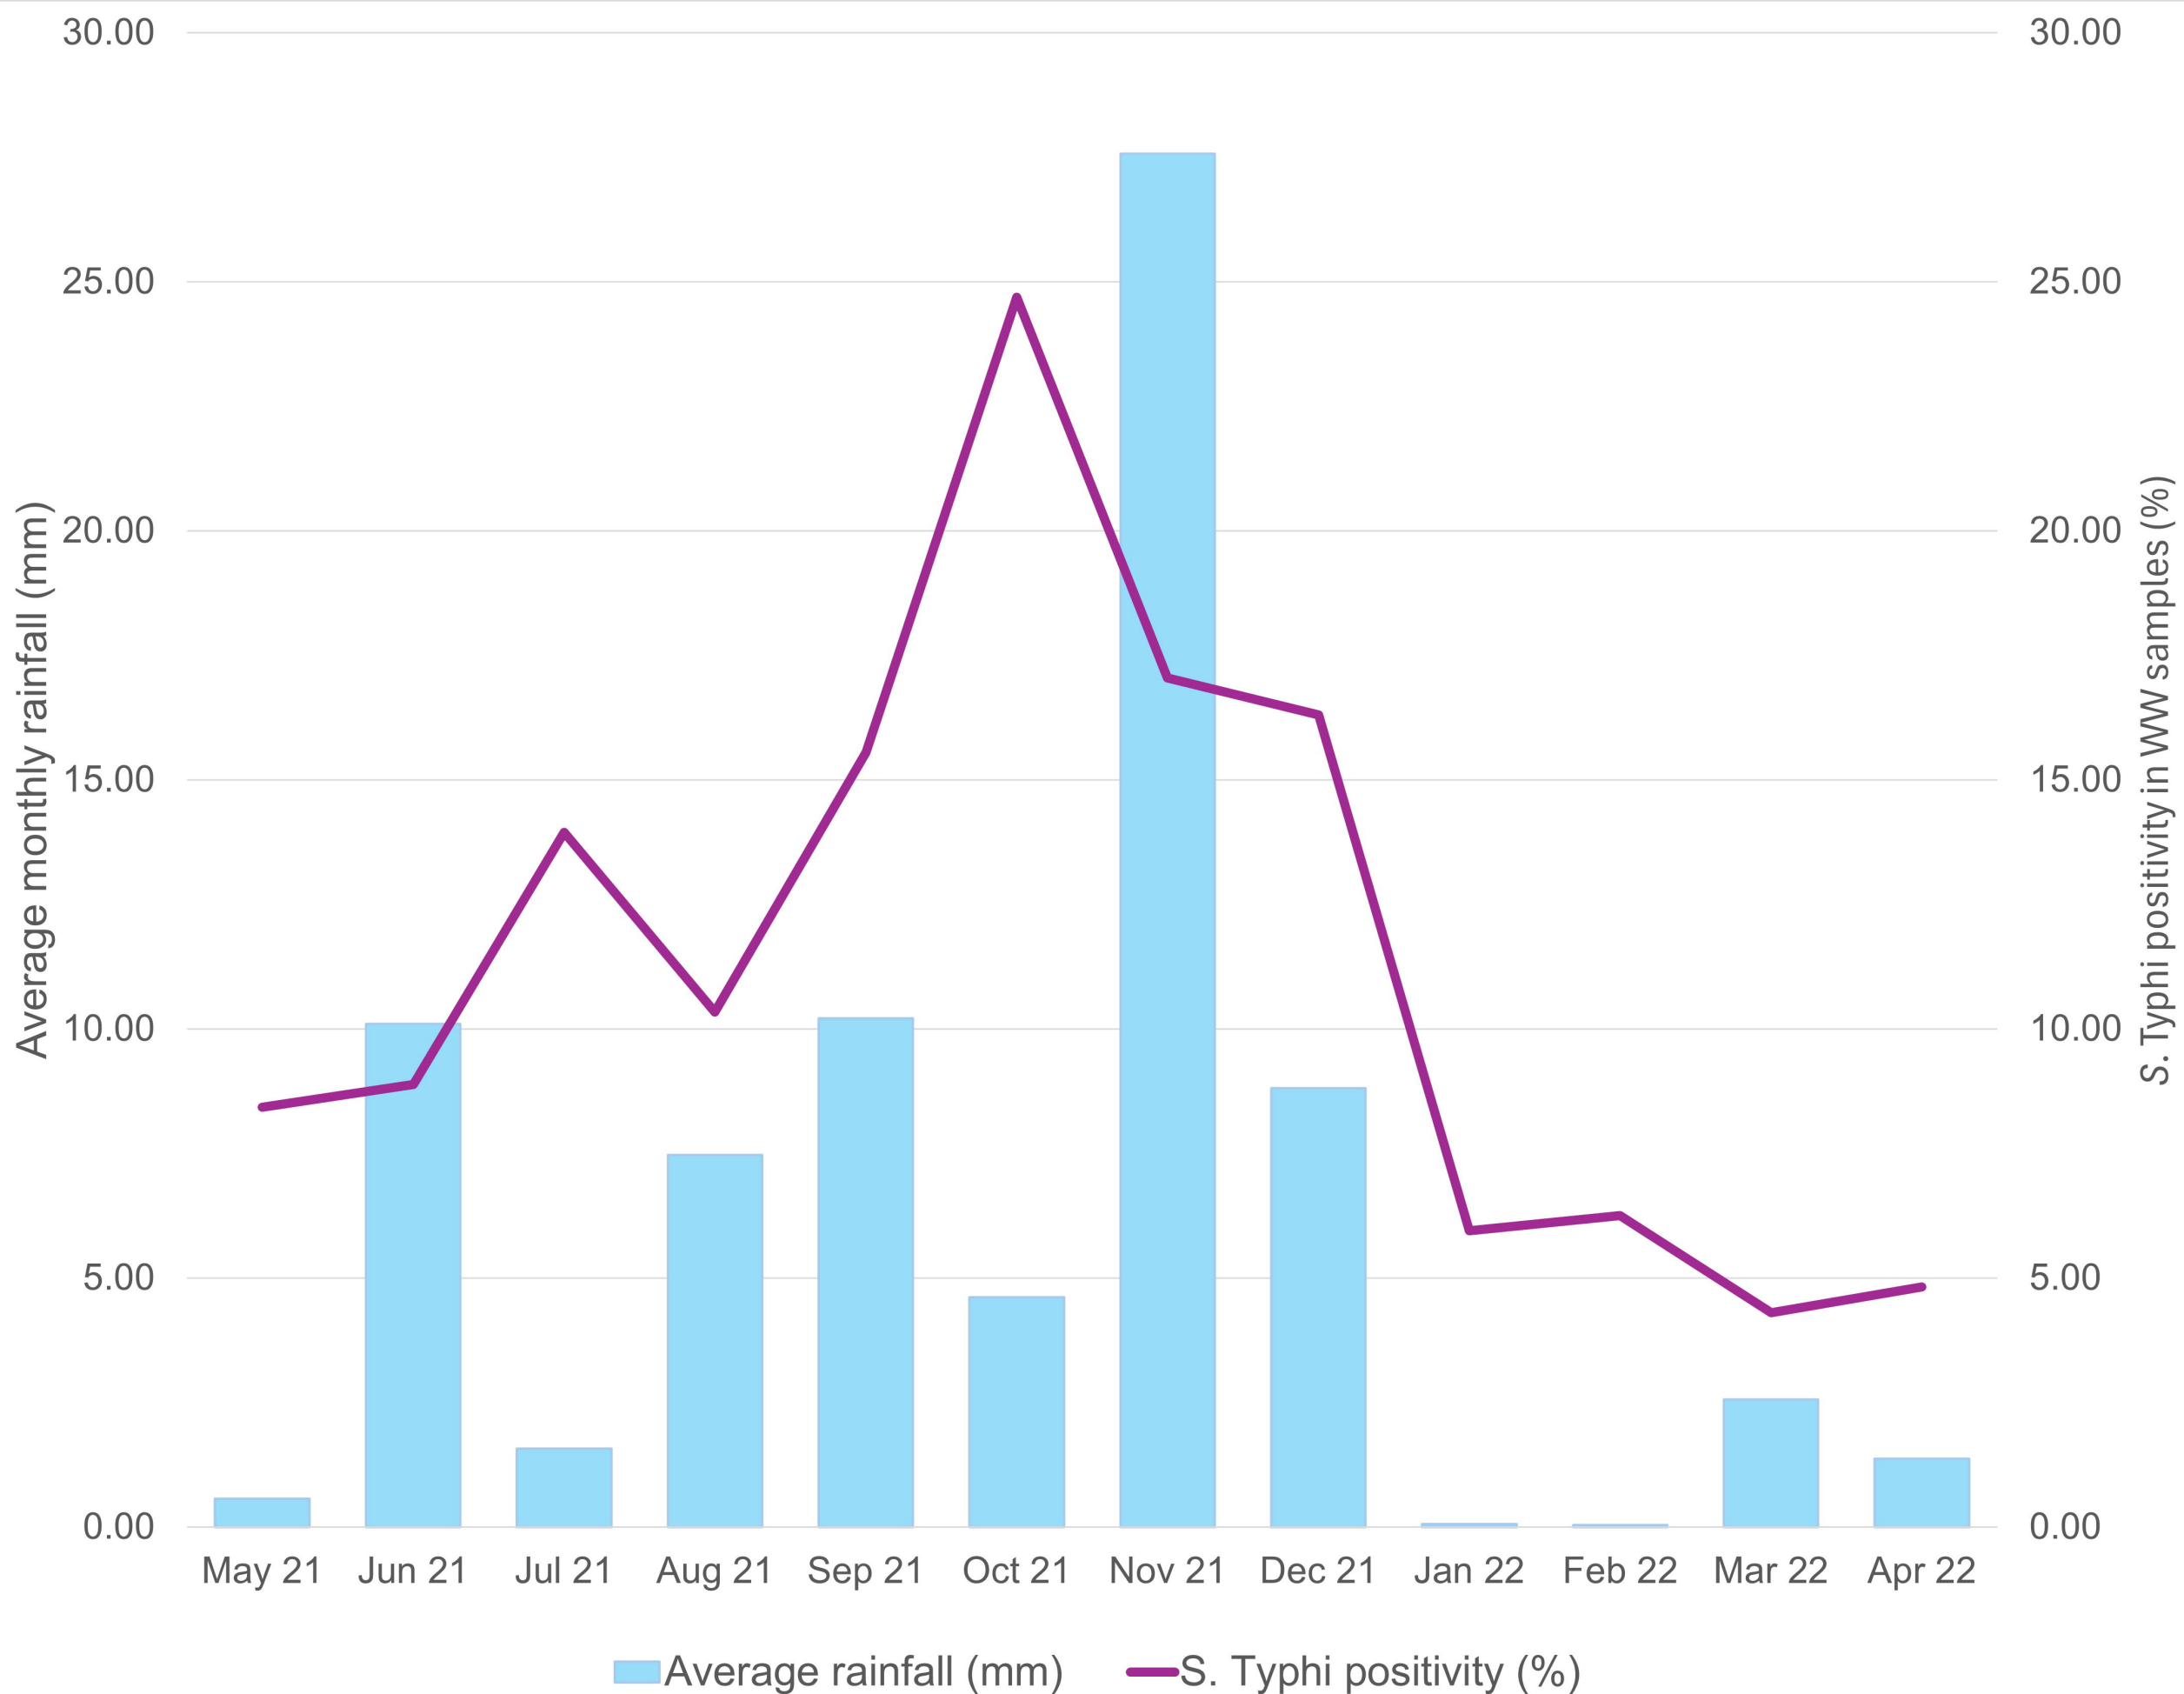

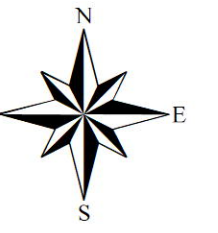

A

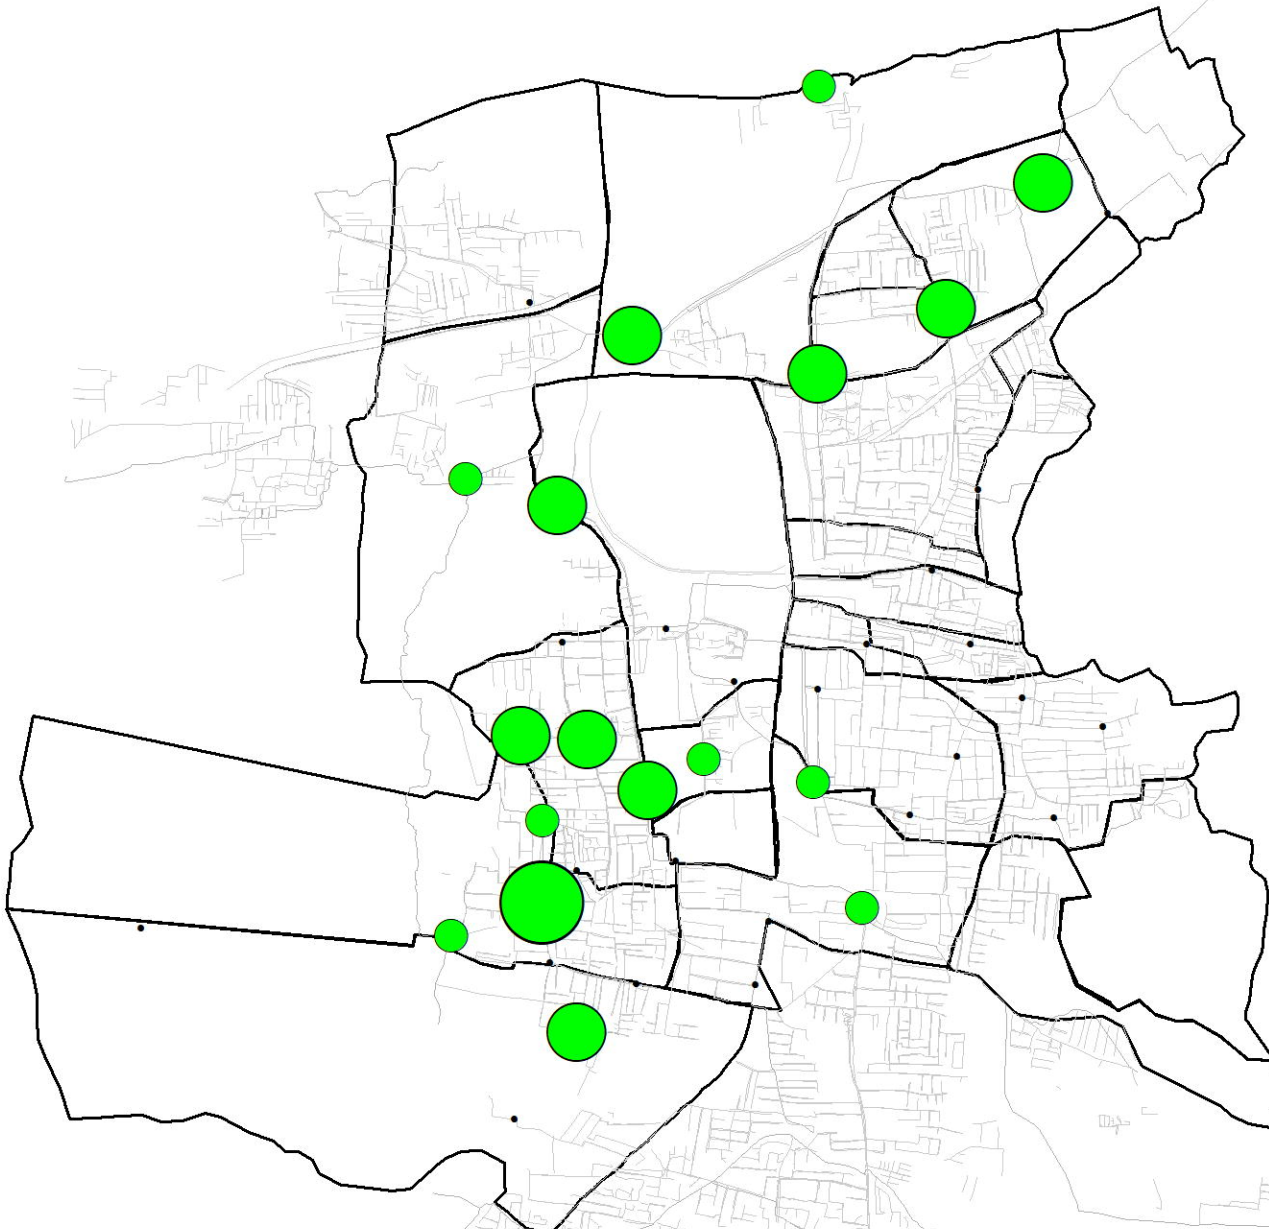

B

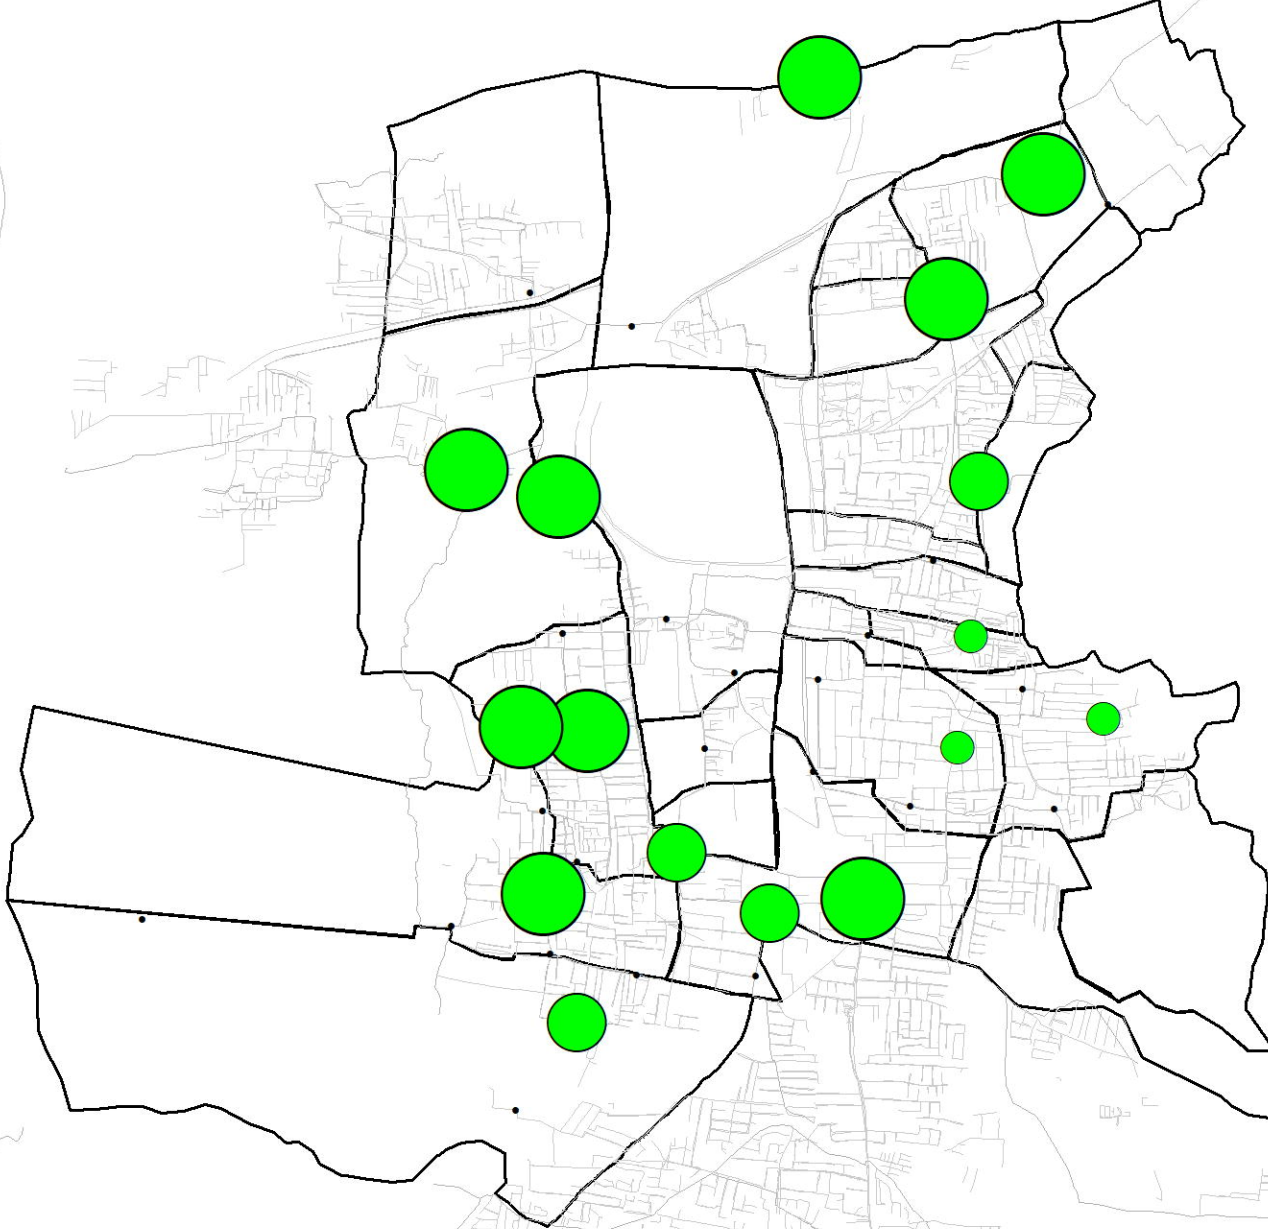

C

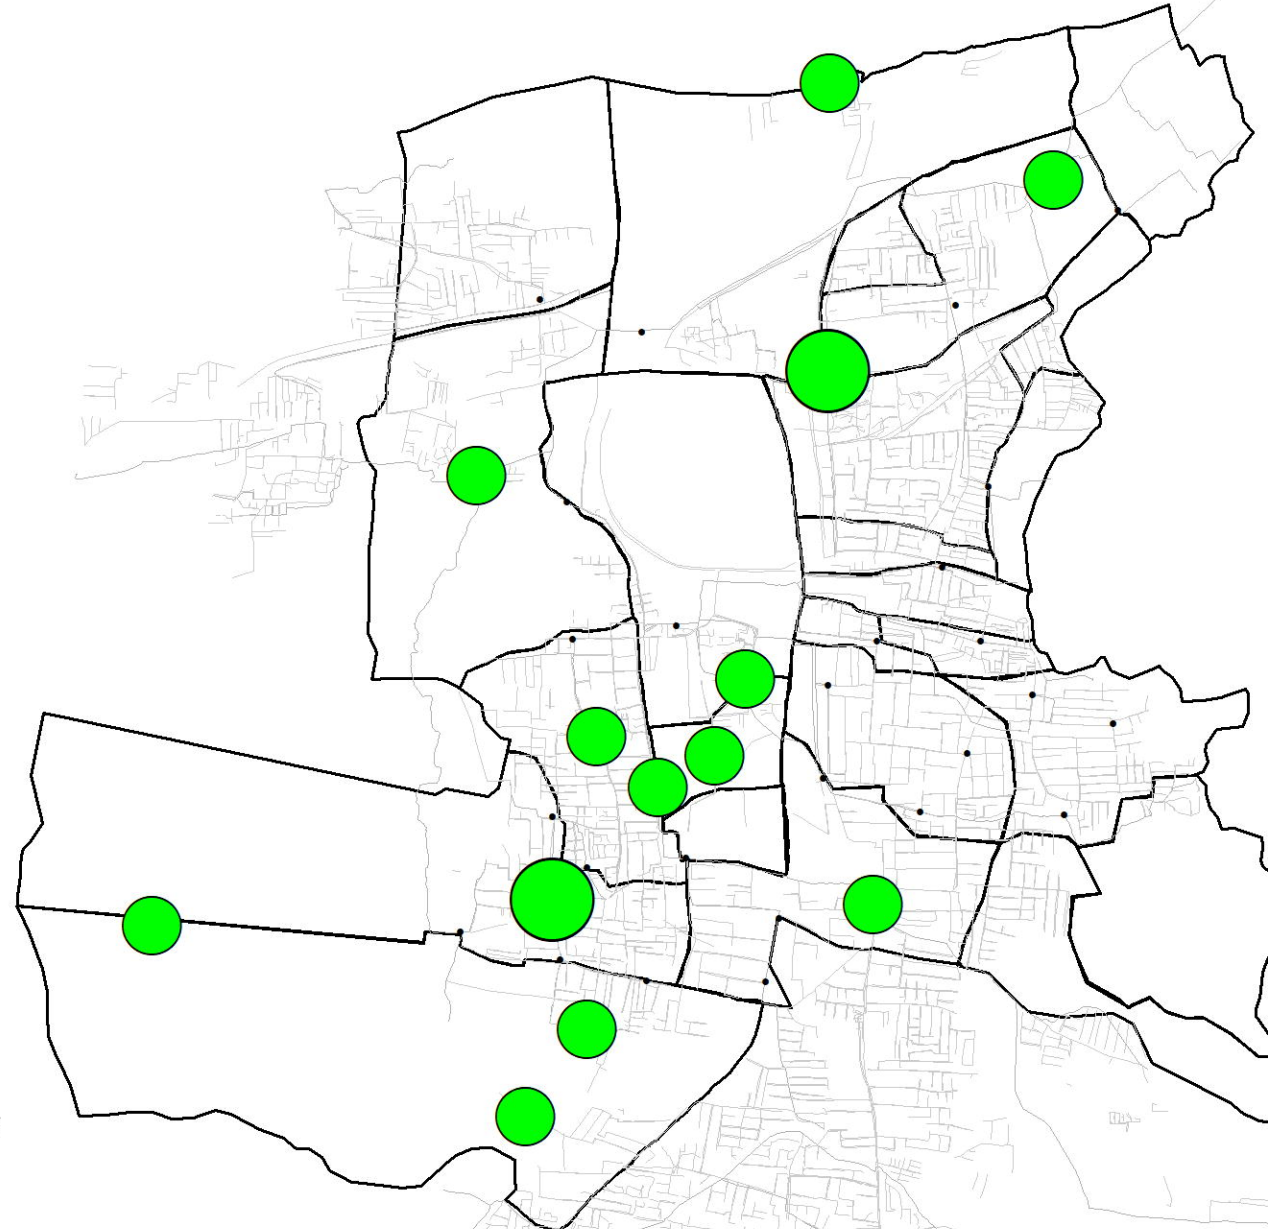

**S typhi detection**

%

- 0.0
- 0.1 - 10.0
- 10.1 - 30.0
- 30.1 - 70.0

### Catchment areas (independent)

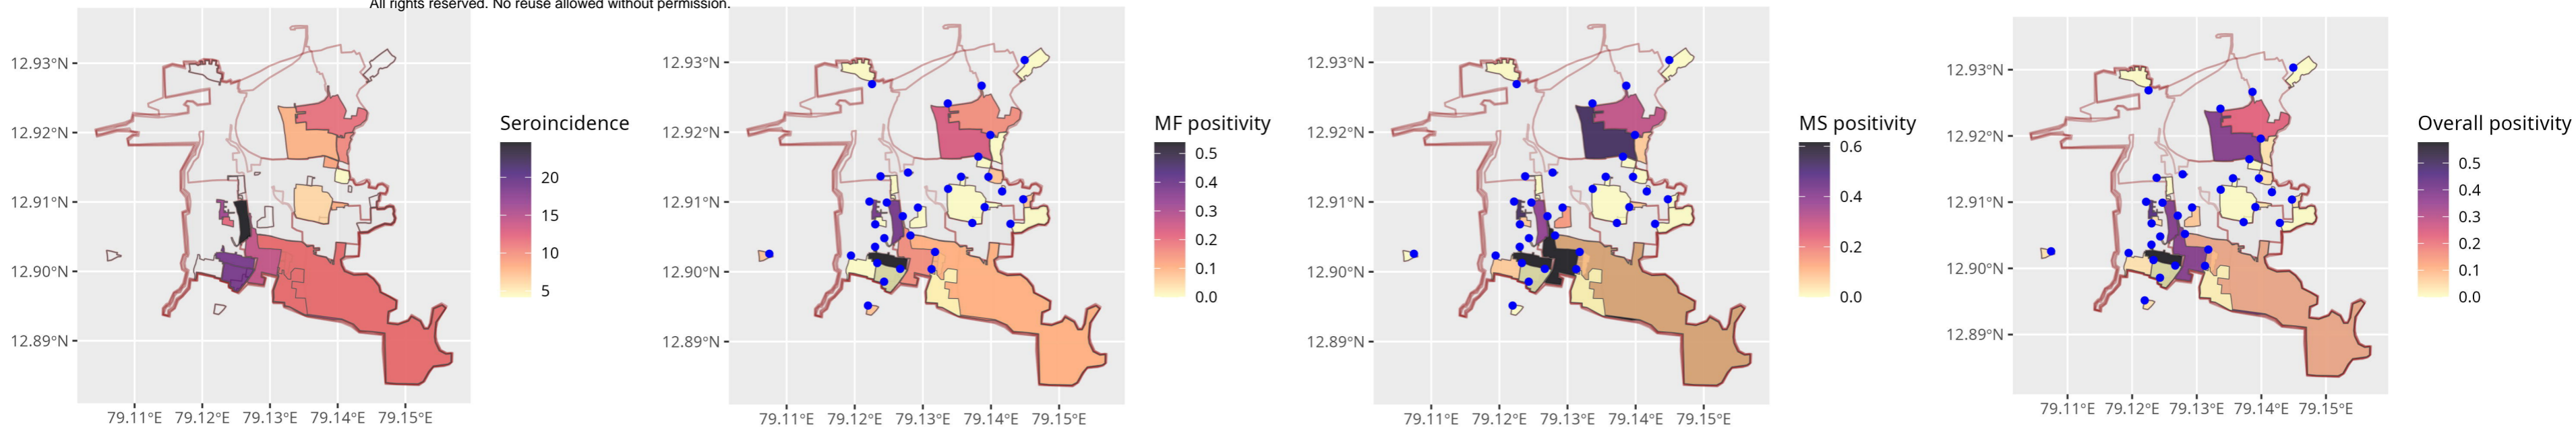

### Catchment areas (nested=1)

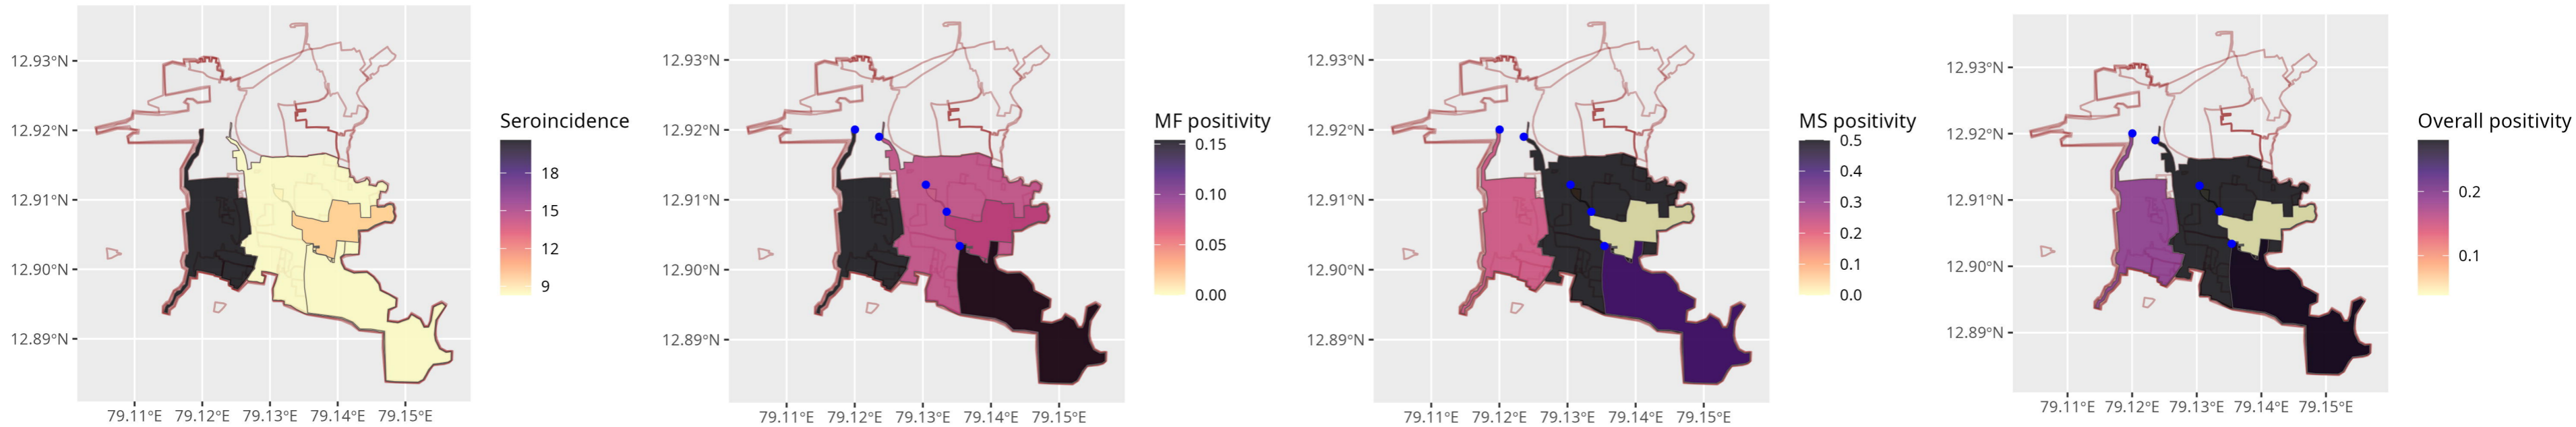

### Catchment areas (nested=2)

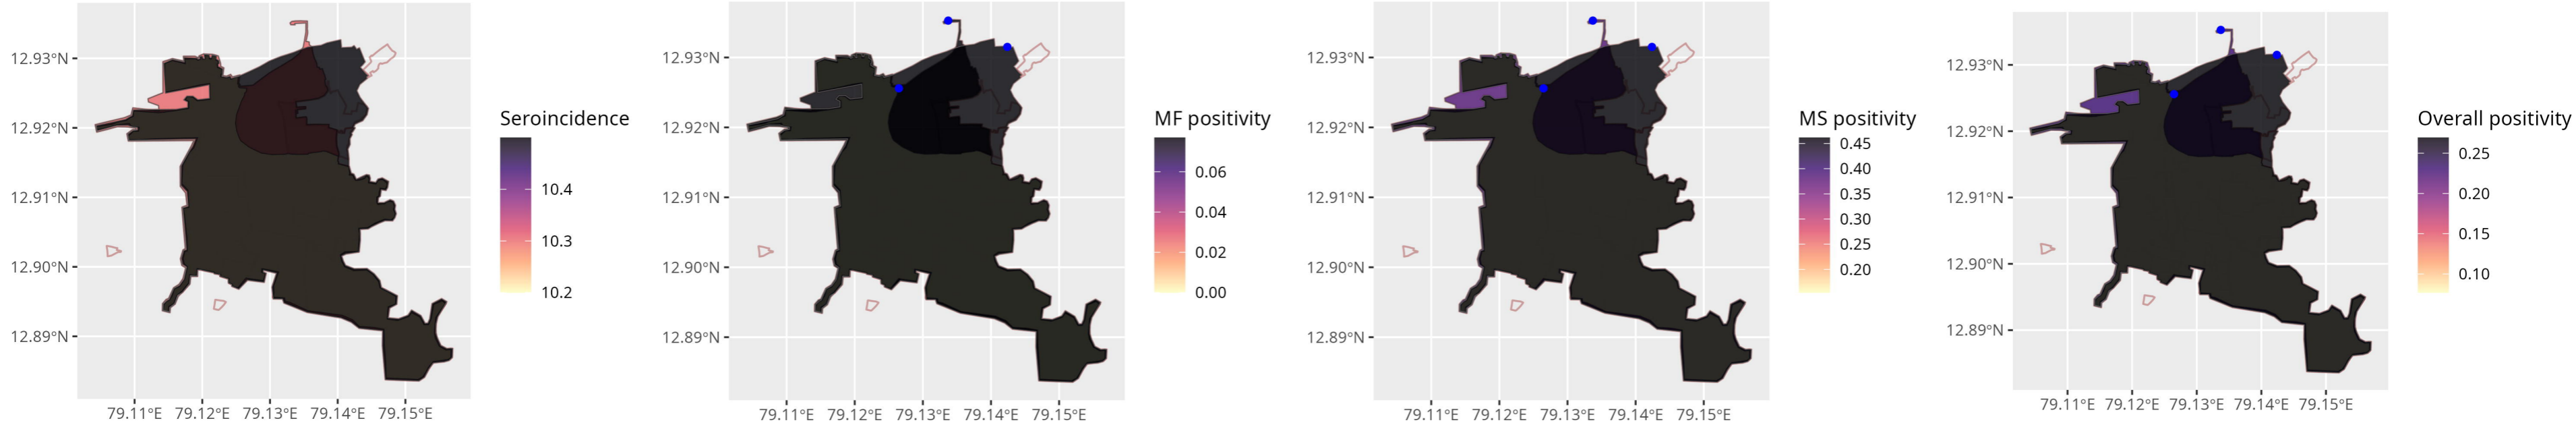

Source: https://medrxiv.org/content/10.1101/2024.07.25.24310996v1.full.pdf
